1 **Low doses of selenium nanoparticles enhance the performance of the**  
2 **generalist parasitoid *Anisopteromalus calandrae***

3

4 RUNNING TITLE: SELENIUM NANOPARTICLES AND A PARASITOID

5

6 James Rudolph Miksanek<sup>1\*</sup>, Charles Adarkwah<sup>1,2,3</sup>, Midori Tuda<sup>1\*</sup>

7

8 <sup>1</sup>Laboratory of Insect Natural Enemies, Institute of Biological Control, Faculty of Agriculture, Kyushu  
9 University, Fukuoka 819-0395, Japan

10

11 <sup>2</sup>Department of Horticulture and Crop Production, School of Agriculture and Technology, Dormaa-  
12 Ahenkro Campus, University of Energy and Natural Resources, Sunyani, Ghana

13

14 <sup>3</sup>Humboldt-University of Berlin, Division Urban Plant Ecophysiology, Faculty Life Sciences, 14195,  
15 Berlin, Germany

16

17 \*Correspondence:

18 Laboratory of Insect Natural Enemies

19 Faculty of Agriculture

20 Kyushu University

21 Fukuoka 819-0395 (Japan)

22 email: [miks0007@umn.edu](mailto:miks0007@umn.edu)

23 **ABSTRACT**

24 **BACKGROUND:** The environmental and economic costs of conventional insecticides have stirred an  
25 interest in alternative management tactics, including the use of nanotechnologies. Selenium nanoparticles  
26 (SeNPs) have many applications in agriculture but may not be compatible with biological control;  
27 however, low concentrations of SeNPs may benefit natural enemies via hormesis. This study investigates  
28 the dose-dependent effects of SeNPs (0–1000 mg L<sup>-1</sup>) on *Anisopteromalus calandrae* (Howard)  
29 (Hymenoptera: Pteromalidae), a generalist parasitoid of stored product pests.

30

31 **RESULTS:** The LC<sub>50</sub> of SeNPs was 1540 mg L<sup>-1</sup> for female parasitoids and 1164 mg L<sup>-1</sup> for males  
32 (which was not significantly different between sexes). SeNPs had a significant hormetic effect; average  
33 lifespan increased by 10% at a dose of 4.03 mg L<sup>-1</sup> for females and by 35% at 13.83 mg L<sup>-1</sup> for males. In  
34 a bioassay including hosts, low-dose SeNPs (25 mg L<sup>-1</sup>) enhanced female performance; lifespan  
35 increased by 23% and the number of offspring increased by 88%. However, the number of emerging hosts  
36 (azuki bean beetle *Callosobruchus chinensis* (L.) (Coleoptera: Chrysomelidae: Bruchinae)) did not  
37 significantly decrease; in the absence of parasitism, SeNPs improved emergence by 17%.

38

39 **CONCLUSION:** Because higher concentrations of SeNPs reduced parasitoid lifespan, whereas low doses  
40 enhanced not only parasitoid performance but also host emergence, practitioners will need to pay special  
41 attention when optimizing SeNP formulations to maximize their contribution to pest control or in the  
42 mass rearing of insect parasitoids.

43

44 **Keywords:** integrated pest management, biological control, nanotechnology, biological control, stored  
45 product pests, dose-response, hormesis

## 46 1. INTRODUCTION

47 The complementarity of chemical, cultural, biological, and other control strategies is a key aspect of  
48 integrated pest management (IPM)<sup>1,2</sup>. Because there tend to be compatibility issues between conventional  
49 insecticides and natural enemies<sup>3-5</sup>, and due to the environmental and economic costs of these  
50 pesticides<sup>6,7</sup>, there are ongoing efforts to counter an overreliance on chemical control and incorporate  
51 safer biorational alternatives to improve management outcomes and meet sustainable development goals  
52 (SDGs)<sup>8-10</sup>. Emerging research is also investigating the possible roles of nanotechnology in pest  
53 management, including the use of entomotoxic nanoparticles (NPs) or nano-encapsulated pesticides<sup>11,12</sup>;  
54 despite this effort, the ecological risks of NPs remain relatively unknown<sup>11,13-15</sup>. Due to the nonspecific  
55 mode of action of elemental (or elemental oxide) NPs<sup>16</sup>, these products might pose a risk towards  
56 nontarget organisms, including natural enemies.

57 Even though the sublethal effects of insecticides on natural enemies are typically negative<sup>3,17</sup>,  
58 there are also instances in which they can be positive<sup>18</sup>. The term “hormesis” (or “hormoligosis” in  
59 insects<sup>19</sup>) refers to the positive or stimulatory effect of low doses of a chemical stressor, which can be  
60 characterized by a biphasic dose-response curve<sup>20</sup>. Since pesticide residues are often present throughout  
61 the agroecological landscape, it is important to understand how these (and other stressors) influence the  
62 biological control services provided by natural enemies. A hormetic response may improve pest  
63 suppression or be applicable to the mass rearing and release of commercial biological control agents<sup>18,21</sup>.  
64 Although there are many variables that affect the persistence of anthropogenic NPs in the environment  
65 (and their relationship to naturally occurring NPs)<sup>15,21,22</sup>, relatively small or residual amounts of NPs  
66 might offer a direct benefit to biological control agents by hormesis.

67 *Anisopteromalus calandrae* (Howard) (Hymenoptera: Pteromalidae) is a cosmopolitan parasitoid  
68 that attacks a broad range of hosts, including the azuki bean beetle *Callosobruchus chinensis* (L.) and the  
69 cowpea seed beetle *C. maculatus* (F.) (Coleoptera: Chrysomelidae: Bruchinae)<sup>23</sup>. As solitary idiobiont  
70 ectoparasitoids, females typically lay one egg after paralyzing a host<sup>24</sup> (usually a late-instar larva or pupa),  
71 and the developing parasitoid larva feeds from outside of its host; additional parasitoid-induced mortality  
72 can arise via host feeding<sup>25</sup>, a process through which adult female *A. calandrae* attack and consume the  
73 hemolymph of hosts (preferably younger instars<sup>25</sup>) to acquire nutrients for egg maturation<sup>25-27</sup> (and, when  
74 feeding on *C. chinensis*, to enhance longevity as well; JRM, personal observation). Because of the  
75 importance of *A. calandrae* in the control of bruchine beetles (and other coleopteran pests)<sup>28-32</sup>, it is  
76 important to test their compatibility with the entomotoxic NPs that have garnered recent attention—  
77 selenium nanoparticles (SeNPs), in particular<sup>33,34</sup>—as a possible new control strategy for these insects.

78 SeNPs have several potential applications in agriculture: promoting plant growth, bolstering plant  
79 defenses, and acting as an antimicrobial, nematocidal, or insecticidal agent, depending on the

80 concentration or formulation<sup>35–37</sup>. The entomotoxic effects of SeNPs arise through the slow release of  
81 elemental selenium, which, depending on the route of entry, may amass in the Malpighian tubules and  
82 midgut, negatively impacting the growth, development, and survival of the target insect<sup>38–40</sup>. While SeNPs  
83 have shown some promise as an alternative control method for bruchine beetles, including *C.*  
84 *chinensis*<sup>33,34</sup>, there is evidence they may also harm the parasitoid *A. calandrae* when applied  
85 concurrently<sup>34</sup>. However, lower doses of SeNPs may actually enhance parasitoid performance via  
86 hormesis. The purpose of the present study is to investigate the dose-dependent effects of SeNPs (0–1000  
87 mg L<sup>-1</sup>) on the lifespan of the generalist parasitoid *A. calandrae* and to test the hormetic effects of low  
88 doses of SeNPs (25 mg L<sup>-1</sup>) on parasitoid performance (lifespan, fecundity, offspring emergence time,  
89 age-dependent parasitism rate, and host suppression), all of which is relevant in the control of the azuki  
90 bean beetle and has important implications for other IPM programs that incorporate *A. calandrae* or  
91 related generalist parasitoids.

92

## 93 **2. METHODS**

94 Colonies of the azuki bean beetle, *C. chinensis* (strain jC, originating from Japan), and its parasitoid *A.*  
95 *calandrae* (also from Japan) have been maintained under laboratory conditions (30°C, 60% R.H., 16:8  
96 L:D) for more than 20 years on dried azuki beans, *Vigna angularis* var. *angularis* (Willdenow) Ohwi &  
97 Ohashi (Fabaceae) (Daiwa Grain Co., Obihiro, Japan). The chemical synthesis of SeNPs<sup>41,42</sup> (amorphous  
98 and approximately 5–10 and 60–100 nm in diameter) was previously described by Miksanek & Tuda<sup>33</sup>; in  
99 brief, a 20-mL solution of SeNPs (1000 mg L<sup>-1</sup>) was prepared by reducing sodium selenite (43.8 mg) with  
100 ascorbic acid (2 mL, 0.633 M) in ultrapure water (17.9 mL; Milli-Q, 18.2 MΩ·cm) and stabilizing with  
101 polysorbate 20 (100 μL). Additional SeNP concentrations of 1, 10, 25, 50, 100, 200, and 500 mg L<sup>-1</sup> were  
102 made by diluting the original solution with ultrapure water; a 0 mg L<sup>-1</sup> control solution (containing only  
103 ultrapure water) was also prepared.

104

### 105 **2.1 Dose-dependent toxicity**

#### 106 **2.1.1 Bioassay**

107 Newly emerged (< 24 h) adult parasitoids (males and females) were placed individually in mini-sized  
108 Petri dishes (35 mm in diameter, 10 mm in height) before adding a 20-μL droplet of SeNPs (0, 1, 10, 50,  
109 100, 200, 500, or 1000 mg L<sup>-1</sup> (0–20 μg SeNPs)). Each Petri dish was gently agitated to evenly coat all  
110 surfaces as well as the parasitoid with SeNPs. After this initial treatment, the parasitoids were placed in a  
111 climate-controlled chamber (30°C, 60% R.H., 16:8 L:D) and monitored daily until death. All eight SeNP  
112 concentrations were replicated 25 times for each sex, for a total of 400 parasitoids.

113

## 114 2.1.1 Analysis

115 The concentration-dependent effects of SeNPs on parasitoid lifespan (age-at-death,  $x$ ) were described  
116 using the Cedergreen–Ritz–Streibig modification of a log-logistic model, which allows for an effect of  
117 hormesis<sup>43,44</sup>. This model takes the form:

118

$$f(x) = \frac{d + f \exp(-1/x^\alpha)}{1 + \exp(b(\log(x) - \log(e)))} \quad (1)$$

119

120 in which  $d$  is the upper horizontal asymptote and  $f$  is the magnitude of the effect of hormesis (with  $\alpha$   
121 affecting the shape of the peak); the parameters  $b$  and  $e$  have no direct biological interpretation in the  
122 Cedergreen–Ritz–Streibig modification of the log-logistic model (in the related three-parameter log-  
123 logistic model,  $b$  is a scaling factor and  $e$  is an inflection point that corresponds with the EC<sub>50</sub> or  
124 LC<sub>50</sub>)<sup>43,44</sup>. If the parameter  $f$  is equal to 0, then there is no hormetic effect and the model simplifies to a  
125 three-parameter log-logistic curve<sup>43,44</sup>.

126 Model fitting and analysis was conducted in R version 4.2.2. The term  $\alpha$  was set to 0.5 when  
127 fitting the four-parameter Cedergreen–Ritz–Streibig model<sup>43,44</sup>. Parasitoid sex was included as a grouping  
128 factor when estimating the parameters  $b$  and  $d$  (the model was simplified because preliminary analyses  
129 showed no significant effect of sex on estimates of  $e$  and  $f$ ). The package *drc* was used in the analysis,  
130 which also allowed for estimating the maximum effect of hormesis from the mean response predicted by  
131 the model (using the “MAX” function<sup>44</sup>, as described by Cedergreen et al.<sup>43</sup>), lethal concentrations (e.g.  
132 LC<sub>50</sub>), and calculating  $t$ -statistics for comparisons between sexes<sup>43,44</sup>.

133

## 134 2.2 Low-dose SeNPs and parasitoid performance

### 135 2.2.1 Bioassay

136 The effects of a low dose of SeNPs on the lifespan and reproductive success of *A. calandrae*, as well as  
137 offspring emergence timeline, were tested by exposing parasitoids to infested azuki beans treated with  
138 either SeNPs or water. The experimental design consisted of a full factorial for parasitism (*A. calandrae*  
139 present or absent) and SeNP application (0 or 25 mg L<sup>-1</sup> SeNPs). For this bioassay, a concentration of 25  
140 mg L<sup>-1</sup> SeNPs was chosen because a preliminary analysis of dose-dependent survivorship suggested that  
141 this approximate concentration may best enhance parasitoid performance.

142 Adult parasitoids were collected from a laboratory colony within 24 h of emergence. Next, each  
143 male–female pair was treated with a 20- $\mu$ L droplet of SeNPs (0.5  $\mu$ g SeNPs) or ultrapure water (as  
144 previously described) and provided 8 azuki beans (1.1 g) treated concurrently and in the same manner (by  
145 gently agitating each dish evenly coat all surfaces as well as the beans with SeNPs) with a 30- $\mu$ L droplet<sup>33</sup>

146 (0.75  $\mu\text{g}$  SeNPs). Each bean was infested by eight mixed-stage *C. chinensis* larvae (indirectly counted as  
147 the number of eggs on the surface of the bean); by the time of parasitoid exposure, most larvae were 15–  
148 16 days old, which is the favored host stage for parasitism; the smaller number of younger larvae are the  
149 preferred size for host-feeding. Beans and parasitoids were placed in a small Petri dish (55 mm in  
150 diameter, 15 mm in height). The male parasitoid was discarded after 24 h to prevent excessive sexual  
151 harassment. Parasitoid mortality was monitored at 24-h intervals. After four days, females were provided  
152 with a fresh set of infested beans (of the same treatment conditions), and the original sets of beans were  
153 checked daily to record the number of emerging adults (hosts and parasitoids). The second set of beans  
154 were not monitored for daily emergence, but the total number of emerged parasitoids was recorded three  
155 weeks after the death of the parental parasitoid in order to calculate lifetime reproduction. Each  
156 combination of treatments was replicated 30 times, for a total of 120 replicates; daily emergence was only  
157 recorded from a subset of replicates (24 replicates for each of the treatments in the absence of parasitism  
158 and 25 from each of those with a parasitoid present).

159

### 160 **2.2.2 Analysis**

161 The effects of SeNPs on the lifespan and fecundity of adult female parasitoids were tested with a Cox  
162 proportional hazards model and linear regression model, respectively. A binomial GLM was used to test  
163 the effects of SeNP treatment on the sex ratio of the resulting parasitoid offspring. The effects of SeNPs  
164 on the development time of offspring (days to adult emergence) were assessed with a Cox proportional  
165 hazards model, with sex and the interaction between sex and SeNP treatment as additional factors; the  
166 identity of the maternal parasitoid was included as a random effect by clustering.

167 To further investigate the reproduction of female parasitoids, a linear regression was used to  
168 assess the relationship between the log-transformed early rate of reproduction (the age-corrected number  
169 of offspring per day, calculated as the number of offspring produced from days 0–3 (inclusive) divided by  
170 the lifespan of the parasitoid) and SeNP treatment on the reproductive rate later in life (from day 4–death,  
171 calculated in the same fashion); only parasitoids with a lifespan greater than 4 days and a nonzero early  
172 reproductive rate were included in this analysis. Next, to investigate the influence of SeNPs on the  
173 lifetime reproductive success (total number of offspring) of female parasitoids as a function of age, an  
174 asymptotic Michaelis–Menten-type model was fit to the data. This model predicts the total number of  
175 offspring of a female parasitoid living to age  $t$  as:

176

$$f(t) = \frac{m(t - t_{\text{pre}})}{\beta \exp(-\gamma[\text{Se}]) + t - t_{\text{pre}}} \quad (2)$$

177

178 Analogous to the standard Michaelis-Menten model, the parameter  $m$  denotes the upper asymptote of the  
179 saturating curve and  $\beta$  is associated with the midpoint of the saturating curve; biologically,  $m$  represents  
180 the maximum number of parasitoid offspring (limited by host depletion or as a more general effect of  
181 parasitoid senescence). The modifications on the Michaelis-Menten model include an  $x$ -intercept ( $t_{\text{pre}}$ ) and  
182 the effect of SeNPs ( $\exp(-\gamma[\text{Se}])$ ). The term  $t_{\text{pre}}$  applies a horizontal transformation to the curve;  
183 biologically,  $t_{\text{pre}}$  represents the length of the pre-oviposition period of the adult female (a female might  
184 use this time for mating, sperm storage, host feeding, or egg maturation). The function  $\exp(-\gamma[\text{Se}])$   
185 applies an effect  $\gamma$  of SeNPs ( $[\text{Se}] = 0$  or  $25 \text{ mg L}^{-1}$ ) to  $\beta$ ; thus, at a concentration of  $0 \text{ mg L}^{-1}$  (or if there  
186 is no effect  $\gamma$ ), then  $\beta$  is unaffected. For simplicity, the Michaelis-Menten-type model only considers the  
187 effect of SeNPs on the parameter  $\beta$ ; however, this formulation was also supported by an informal analysis  
188 of the shortest- and longest-lived parasitoids (0–3 and 9–12 days, respectively), in which there were no  
189 differences in the reproduction of control and SeNP-treated parasitoids in either age class, suggesting that  
190  $m$  and  $t_{\text{pre}}$  are likely independent of SeNP treatment.

191 Finally, the effects of SeNPs and parasitism on the number and sex ratio of emerging hosts were  
192 tested with a linear mixed-effects model (LMM) and binomial generalized mixed-effects model (GLMM),  
193 respectively. In both models, the identity of the source colony was included as a random effect to account  
194 for potential variation in the stage structure or exact number of hosts; because source colony did not  
195 improve the statistical models of parasitoid life history (described above), this random effect was only  
196 included in these analyses of the host population.

197 All modeling and statistical analyses were conducted in R version 4.2.2. The Michaelis-Menten-  
198 type model was fit using nonlinear least squares; confidence intervals for model predictions were  
199 calculated by Monte Carlo simulation ( $n = 100000$ ). The packages *car*, *lme4*, *merTools*, *survival*, *coxed*,  
200 and *propagate* were also used in the analyses.

201

## 202 **3. RESULTS**

### 203 **3.1 Dose-dependent toxicity**

204 The lifespan of adult parasitoids was measured in response to a range of SeNP concentrations (0–1000 mg  
205  $\text{L}^{-1}$ ). In fitting the Cedergreen-Ritz-Streibig-modified log-logistic model to the concentration-dependent  
206 effects of SeNPs on the lifespan of male ( $n = 200$ ) and female ( $n = 200$ ) parasitoids (with parasitoid sex as  
207 a grouping factor when estimating  $b$  and  $d$ ), the estimates for all parameters were significant (Figure 1,  
208 Table 1). The upper asymptote  $d$ —which represents the maximum lifespan in the absence of SeNPs—was  
209  $4.55 \pm 0.15 \text{ d}$  (estimate  $\pm$  SE) for females and  $3.01 \pm 0.16 \text{ d}$  for males, and the difference between sexes  
210 was significant ( $t = 6.27, p < 0.001$ ) (Figure 1; Table 1); the estimates of parameter  $b$  (a scaling factor)  
211 were marginally different between sexes as well ( $t = -1.91, p = 0.057$ ) (Table 1).

212 The  $LC_{50}$  was  $1540 \pm 391$  mg L<sup>-1</sup> for females (estimate  $\pm$  SE) and  $1164 \pm 224$  mg L<sup>-1</sup> for males,  
213 but there was no significant difference in the estimates of  $LC_{50}$  between sexes ( $t = 1.19$ ,  $p = 0.237$ ). For  
214 females, the average age at death of SeNP-treated individuals was 5.02 d at a concentration of 4.03 mg  
215 L<sup>-1</sup>; for males, the average age at death of SeNP-treated individuals was 4.06 d at a concentration of 13.83  
216 mg L<sup>-1</sup> (Figure 1; Table 1).

217

### 218 **3.2 Low-dose SeNPs and parasitoid performance**

219 Parasitoid performance was assessed in response to a low dose (25 mg L<sup>-1</sup>) of SeNPs to investigate the  
220 effects of hormesis on a generalist biological control agent. The performance parameters that were  
221 measured included parasitoid lifespan and fecundity, offspring sex ratio and development time, parasitoid  
222 reproductive rate and lifetime reproductive success, and host emergence and sex ratio.

223 Adult female parasitoids ( $n = 60$ ) treated with 25 mg L<sup>-1</sup> SeNPs lived significantly longer than  
224 control parasitoids; adult lifespan was  $7.53 \pm 0.52$  and  $6.10 \pm 0.48$  d, respectively (mean  $\pm$  SE) (Figure 2a;  
225 Table 2). SeNP-treated females also produced a greater number of offspring; the total number of offspring  
226 was  $13.0 \pm 1.1$  vs.  $6.9 \pm 1.1$  (Figure 2b; Table 2). The sex ratio ( $n = 56$ ) and development time ( $n = 285$ )  
227 of the offspring of SeNP-treated parasitoids did not differ from those of the control (Table 2). Regardless  
228 of SeNP treatment, female offspring ( $n = 233$ ) emerged later than males ( $n = 52$ ); the time to emergence  
229 was  $13.66 \pm 0.09$  and  $12.73 \pm 0.18$  d, respectively (Table 2).

230 For ovipositing female parasitoids with an age of death  $> 4$  d ( $n = 47$ ), the early reproductive rate  
231 was inversely correlated with the rate of reproduction later in life (offspring per day, days 4–death) ( $F_{3,43}$   
232 = 14.94, multiple  $R^2 = 0.510$ ,  $p < 0.001$ ) (Figure 3a). As the early rate of reproduction increased, there  
233 was a decrease in the rate of reproduction later in life; treatment with 25 mg L<sup>-1</sup> SeNPs increased the rate  
234 of reproduction overall (Figure 3a; Table 3a). To investigate the lifetime reproductive success of all  
235 female parasitoids ( $n = 60$ ), a Michaelis–Menten-type model was implemented, in which all parameter  
236 estimates were significant (Figure 3b; Table 3b). The maximum number of offspring  $m$  was  $44.7 \pm 17.8$   
237 (estimate  $\pm$  SE) and the preoviposition period was  $1.90 \pm 0.30$  d (Table 3b). There was also a significant  
238 effect of SeNP treatment  $\gamma$ , with 25 mg L<sup>-1</sup> SeNPs increasing the lifetime reproductive success of female  
239 parasitoids (Figures 3a and 3b; Tables 3a and 3b).

240 Finally, the effects of SeNPs and parasitism on the host population were evaluated as the number  
241 and sex ratio of the emerging hosts in each Petri dish ( $n = 120$ ). The number of emerging hosts was lower  
242 in the presence of a parasitoid than in the absence of the parasitoid but, when treated with SeNPs, was  
243 higher in the absence of parasitism (Figure 4a, Table 4). When treated with 0 mg L<sup>-1</sup> SeNPs, there were  
244 an estimated 21.5 (95% prediction interval: 15.0–28.8) emerging hosts per Petri dish in the absence of  
245 parasitism and 19.1 (12.3–26.1) emerging hosts per dish in the presence of a female parasitoid; when



246 treated with 25 mg L<sup>-1</sup> SeNPs, there were 25.1 (18.6–31.4) emerging hosts per dish in the absence of  
247 parasitism and 17.1 (10.9–23.4) emerging hosts with a parasitoid present (Figure 4a, Table 4). Finally, the  
248 sex ratio of the emerging hosts shifted from a male bias (0.54 [0.51–0.57]) at 0 mg L<sup>-1</sup> SeNPs to a slight  
249 female bias (0.47 [0.45–0.51]) when treated with 25 mg L<sup>-1</sup> SeNPs (Figure 4b, Table 4).

250

#### 251 4. DISCUSSION

252 Because of the environmental and economic costs of conventional chemical insecticides, there is ongoing  
253 interest in exploring alternative management tactics, including the use of nanotechnologies. Selenium  
254 nanoparticles (SeNPs) have many applications in agriculture, but their nonspecific entomotoxic mode of  
255 action may limit their compatibility with biological control agents; however, low concentrations may  
256 benefit natural enemies via hormesis. The present study found that, for the generalist parasitoid *A.*  
257 *calandreae*, the LC<sub>50</sub> of SeNPs was 1.5 g L<sup>-1</sup> for female parasitoids and 1.2 g L<sup>-1</sup> for males, and an  
258 analysis of the dose-response curves identified a significant hormetic effect; for females, the average age  
259 at death increased by 10% at a dose of 4.03 mg L<sup>-1</sup> and, for males, increased by 35% at 13.83 mg L<sup>-1</sup>. In a  
260 follow-up bioassay that provided female parasitoids with hosts, low-dose SeNPs (25 mg L<sup>-1</sup>) were found  
261 to enhance parasitoid performance; female lifespan increased by 23% and the number of offspring  
262 increased by 88%. Regardless, the number of emerging azuki bean beetles (the host *C. calandreae*) did not  
263 significantly decrease after treatment with low-dose SeNPs but rather, in the absence of parasitism,  
264 increased by 17%.

265 There exists a delicate balance in the essential role of selenium as a micronutrient and its dose-  
266 dependent toxicity in both vertebrate and invertebrate animals<sup>35–40,45–49</sup>. In insects, diets with supplemental  
267 selenium can benefit growth, survival, and reproduction, but higher concentrations can have the opposite  
268 effect<sup>36,38–40,46</sup>. While insects play a role in the biogeochemical cycling of selenium<sup>47,49</sup>, little is known of  
269 the impact of selenium on predator–prey or host–parasitoid ecology; the biotransfer or biomagnification<sup>50</sup>  
270 of selenium can negatively affect the development and fitness of predators<sup>51</sup>, and higher concentrations of  
271 selenium can potentially disrupt host–parasitoid population dynamics, with *Cotesia marginiventris*  
272 (Cresson) (Hymenoptera: Braconidae) and the beet armyworm, *Spodoptera exigua* (Hubner)  
273 (Lepidoptera: Noctuidae), serving as an example<sup>49,52</sup>. Even though SeNPs have a lower toxicity and  
274 higher bioavailability than inorganic or organic forms of selenium<sup>37</sup>, applications of SeNPs ranging in  
275 concentration from 100–500 mg L<sup>-1</sup> can still have significant entomotoxic effects<sup>37,53</sup>, including on the  
276 azuki bean beetle<sup>33,34</sup> (although its endosymbiont *Wolbachia* can mediate resistance<sup>33</sup>).

277 In the present study of the *C. chinensis*–*A. calandreae* system, the parasitoid *A. calandreae* also  
278 began showing adverse effects within the 100–500 mg L<sup>-1</sup> range<sup>33,34</sup>. Thus, the concurrent use of SeNPs  
279 and biological control would not be compatible in this case. Similarly, since the pest species also appears

280 to exhibit a hormetic response to low-dose SeNPs ( $25 \text{ mg L}^{-1}$ ), this limits the complementarity of SeNPs  
281 and biological control, at least in the short term; additional studies that extend beyond the single-  
282 parasitoid, single-generation paradigm (and that also address the timing of SeNP applications and residual  
283 effects), would be required to identify any long-term consequences that might be relevant for pest  
284 suppression. But first, there is the fundamental question of whether the performance of *A. calandreae* is  
285 enhanced as a result of a response to SeNPs as a chemical stressor (i.e. hormoligosis/hormesis), via the  
286 potential benefits of selenium as a micronutrient (parasitoids could be observed drinking from dispersed  
287 droplets of SeNPs [or water] before the application completely dried, although this would not offer the  
288 same benefits as supplemental honey or sugar<sup>26,54</sup>), or through some combination of the two.

289 The positive effects of low-dose SeNPs ( $25 \text{ mg L}^{-1}$ ) on lifespan (and fecundity) were more  
290 prominent when hosts were available for host feeding and oviposition, which suggests that SeNPs may at  
291 least alter the nutritional physiology of female parasitoids (and, if linked to host feeding, this may  
292 introduce an additional source of density dependence in the system<sup>55,56</sup>). However, because selenoproteins  
293 have largely been lost in the related parasitoid *Nasonia vitripennis* (Walker) (Hymenoptera: Pteromalidae)  
294 and the honey bee *Apis mellifera* L. (Hymenoptera: Apidae)<sup>57,58</sup>, the positive effects of low-dose SeNPs  
295 are more likely to be a hormetic response to small amounts of oxidative stress or via a reduced stress  
296 threshold rather than as a positive response to an essential micronutrient<sup>69-61</sup>. (Note that most Coleoptera  
297 also lack selenoproteins<sup>57,58,61</sup> as well, so a hymenopteran parasitoid and its coleopteran host might be  
298 expected to exhibit similar physiological responses to SeNPs, which could complicate control efforts.)  
299 Regardless, the ultimate result is an enhancement of parasitoid performance—at least for the treated  
300 parasitoids, since any effects on subsequent generations are currently unknown. So, while not a  
301 complementary control strategy on its own, and offering no net gain as a tactic for enhancing parasitism  
302 over a single generation in the field, the use of low-dose SeNPs (in conjunction with supplemental  
303 nutrients, although this would require further study) may instead have more promising applications in the  
304 mass rearing of commercial control agents for inoculative or inundative release in augmentation  
305 biological control<sup>18</sup>.

306

## 307 5. CONCLUSION

308 Overall, this study provides insight into the role of SeNPs in the control of the azuki bean beetle and has  
309 important implications for other programs that incorporate the generalist *A. calandreae* or closely related  
310 parasitoids; there are also potential applications in the mass rearing of biological control agents. The  
311 results of the present study indicate that, because higher concentrations of SeNPs reduced parasitoid  
312 lifespan—whereas a low-dose treatment benefitted not only the parasitoid but the host as well—the  
313 effects of SeNPs and biological control may neither be compatible nor complementary tactics. However,

314 future studies on the trade-offs between lifespan and reproduction as well as on population-level  
315 responses (extending beyond single-parasitoid, single-generation experiments) may offer additional  
316 insight into the possible roles of SeNPs in the field of pest control.

317 **6. ACKNOWLEDGEMENTS**

318 **6.1 Author contributions**

319 All authors contributed to the study conception and design. Material preparation and data collection were  
320 performed by JRM and CA. JRM and MT participated in data analysis. The first draft of the manuscript  
321 was written by JRM, and all authors commented on subsequent versions of the manuscript. All authors  
322 read and approved the final manuscript.

323

324 **6.2 Data availability**

325 The datasets and R script associated with the current study are available from the primary corresponding  
326 author on request.

327

328 **6.3 Funding**

329 JRM is an International Research Fellow of Japan Society for the Promotion of Science (JSPS). CA was  
330 supported by an Invitational Fellowship from JSPS. MT received additional support by KAKENHI  
331 (19K06840) from JSPS.

332

333 **7. CONFLICT OF INTEREST STATEMENT**

334 The authors declare no conflicts of interest and affirm that the present study was carried out in adherence  
335 to all applicable ethical standards.

## 336 8. REFERENCES

- 337 1. Kogan M, Integrated pest management: Historical perspectives and contemporary developments.  
338 *Annu Rev Entomol* 43:243–270 (1998).
- 339 2. Farrar JJ, Ellsworth PC, Sisco R, Baur ME, Crump A, Fournier AJ, et al., Assessing the compatibility  
340 of a pesticide in an IPM program. *J Integr Pest Manag* 9:3 (2018).
- 341 3. Desneux N, Decourtye A, Delpuech JM, The sublethal effects of pesticides on beneficial arthropods.  
342 *Annu Rev Entomol* 52:81–106 (2007).
- 343 4. Beers EH, Mills NJ, Shearer PW, Horton DR, Milickzy ER, Amarasekare KG, et al., Nontarget  
344 effects of orchard pesticides on natural enemies: Lessons from the field and laboratory. *Biol Control*  
345 102:44–52 (2016).
- 346 5. Schmidt-Jeffris RA, Beers EH, Sater C, Meta-analysis and review of pesticide non-target effects on  
347 phytoseiids, key biological control agents. *Pest Manag Sci* 77:4848–4862 (2021).
- 348 6. Pimentel D, Environmental and economic costs of the application of pesticides primarily in the  
349 United States. *Environ Dev Sustain* 7:229–252 (2005).
- 350 7. Damalas CA, Eleftherohorinos IG, Pesticide exposure, safety issues, and risk assessment indicators.  
351 *Int J Environ Res Public Health* 8:1402–1419 (2011).
- 352 8. Rosell G, Quero C, Coll J, Guerrero A, Biorational insecticides in pest management. *J Pestic Sci*  
353 33:103–121 (2008).
- 354 9. Dangles O, Casas J, Ecosystem services provided by insects for achieving sustainable development  
355 goals. *Ecosyst Serv* 35:109–115 (2019).
- 356 10. Struelens Q, Silvie P, Orienting insecticide research in the tropics to meet the sustainable  
357 development goals. *Curr Opin Insect Sci* 40:24–30 (2020).
- 358 11. Kah M, Hofmann T, Nanopesticide research: Current trends and future priorities. *Environ Int* 63:224–  
359 235 (2014).
- 360 12. Athanassiou CG, Kavallieratos NG, Benelli G, Losic D, Usha Rani P, Desneux N, Nanoparticles for  
361 pest control: Current status and future perspectives. *J Pest Sci* 91:1–15 (2018).
- 362 13. Crane M, Handy RD, Garrod J, Owen R, Ecotoxicity test methods and environmental hazard  
363 assessment for engineered nanoparticles. *Ecotoxicology* 17:421–437 (2008).
- 364 14. Hansen SF, Michelson ES, Kamper A, Borling P, Stuer-Lauridsen F, Baun A, Categorization  
365 framework to aid exposure assessment of nanomaterials in consumer products. *Ecotoxicology*  
366 17:438–447 (2008).
- 367 15. Wagner S, Gondikas A, Neubauer E, Hofmann T, von der Kammer F, Spot the difference:  
368 Engineered and natural nanoparticles in the environment—release, behavior, and fate. *Angew Chem*  
369 *Int Ed* 53:12398–12419 (2014).

- 370 16. Benelli G, Mode of action of nanoparticles against insects. *Environ Sci Pollut Res* 25:12329–12341  
371 (2018).
- 372 17. Stark JD, Vargas R, Banks JE, Incorporating ecologically relevant measures of pesticide effect for  
373 estimating the compatibility of pesticides and biocontrol agents. *J Econ Entomol* 100:1027–1032  
374 (2007).
- 375 18. Cutler GC, Amichot M, Benelli G, Guedes RNC, Qu Y, Rix RR, et al., Hormesis and insects: Effects  
376 and interactions in agroecosystems. *Sci Total Environ* 825:153899 (2022).
- 377 19. Luckey TD, Insecticide hormoligosis. *J Econ Entomol* 61:7–12 (1968).
- 378 20. Cutler GC, Insects, insecticides, and hormesis: Evidence and considerations for study. *Dose–*  
379 *Response* 11:154–177 (2013).
- 380 21. Guedes RNC, Cutler GC, Insecticide-induced hormesis and arthropod pest management. *Pest Manag*  
381 *Sci* 70:690–697 (2013).
- 382 22. Malakar A, Kanel SR, Ray C, Snow DD, Nadagouda MN, Nanomaterials in the environment, human  
383 exposure pathway, and health effects: A review. *Sci Total Environ* 759:143470 (2021).
- 384 23. Zhang Y, Yu F, Wu L, Dai R, Yang H, Zhang X, Hu D, Life history traits of the parasitoid  
385 *Anisopteromalus calandrae* (Hymenoptera: Pteromalidae) on three beetle hosts. *J Stored Prod Res*  
386 97:101973 (2022).
- 387 24. Perkin LC, Friesen KS, Flinn PW, Oppert B, Venom gland components of the ectoparasitoid wasp,  
388 *Anisopteromalus calandrae*. *J Venom Res* 6:19–37 (2015).
- 389 25. Choi WI, Yoon TJ, Ryoo MI, Host-size-dependent feeding behavior and progeny sex ratio of  
390 *Anisopteromalus calandrae* (Hym., Pteromalidae). *J Appl Entomol* 125:71–77 (2001).
- 391 26. Schmale I, Wäckers FL, Cardona C, Dorn S, Control potential of three hymenopteran parasitoid  
392 species against the bean weevil in stored beans: The effect of adult parasitoid nutrition on longevity  
393 and progeny production. *Biol Control* 21:134–139 (2001).
- 394 27. Menon A, Flinn PW, Dover BA, Influence of temperature on the functional response of  
395 *Anisopteromalus calandrae* (Hymenoptera: Pteromalidae), a parasitoid of *Rhyzopertha dominica*  
396 (Coleoptera: Bostrichidae). *J Stored Prod Res* 38:463–469 (2002).
- 397 28. Clausen CP, Introduced Parasites and Predators of Arthropod Pests and Weeds: A World Review.  
398 *United States Department of Agriculture Handbook* (1978).
- 399 29. Van Huis A, Biological methods of bruchid control in the tropics: A review. *Insect Sci Appl* 12:87–  
400 102 (1991).
- 401 30. Tuda M, Chou L-Y, Niyomdham C, Buranapanichpan S, Tateishi Y, Ecological factors associated  
402 with pest status in *Callosobruchus* (Coleoptera: Bruchidae): High host specificity of non-pests to  
403 Cajaninae (Fabaceae). *J Stored Prod Res* 41:31–45 (2005).

- 404 31. Tuda M, Shimada M, Complexity, evolution, and persistence in host–parasitoid experimental systems  
405 with *Callosobruchus* beetles as the host. *Adv Ecol Res* 37:37–75 (2005).
- 406 32. Tuda M, Rönn J, Buranapanichpan S, Wasano N, Arnqvist G, Evolutionary diversification of the bean  
407 beetle genus *Callosobruchus* (Coleoptera: Bruchidae): Traits associated with stored-product pest  
408 status. *Mol Ecol* 15:3541–3551 (2006).
- 409 33. Miksanek JR, Tuda M, Endosymbiont-mediated resistance to entomotoxic nanoparticles and sex-  
410 specific responses in a seed beetle. PREPRINT (Version 1) available at Research Square:  
411 <https://doi.org/10.21203/rs.3.rs-1941333/v1>
- 412 34. Helmy EAM, San PP, Zhang YZ, Adarkwah C, Tuda M, Fungus-synthesized nanoparticle and their  
413 target and nontarget effects on stored bean pest beetles and their parasitoid. PREPRINT (Version 1)  
414 available at Research Square: <https://doi.org/10.21203/rs.3.rs-2097277/v1>
- 415 35. El-Ramady HR, Domokos-Szabolcsy É, Abdalla NA, Alshaal TA, Shalaby TA, Sztrik A, et al.,  
416 Selenium and nano-selenium in agroecosystems. *Environ Chem Lett* 12:495–510 (2014).
- 417 36. Mechora Š, Selenium as a protective agent against pests: A review. *Plants* 8:262 (2019).
- 418 37. Garza-García JJO, Hernández-Díaz JA, Zamudio-Ojeda A, León-Morales JM, Guerrero-Guzmán A,  
419 Sánchez-Chiprés DR, et al., The role of selenium nanoparticles in agriculture and food technology.  
420 *Biol Trace Elem Res* 200:2528–2548 (2022).
- 421 38. Simmons TW, Jamall IS, Lockshin RA, Accumulation, distribution and toxicity of selenium in the  
422 adult house fly, *Musca domestica*. *Comp Biochem Physiol* 91: 559–563 (1988).
- 423 39. Hogan GR, Razniak HG, Selenium-induced mortality and tissue distribution studies in *Tenebrio*  
424 *molitor* (Coleoptera: Tenebrionidae). *Environ Entomol* 20:790–794 (1991).
- 425 40. Lalitha K, Rani P, Narayanaswami V, Metabolic relevance of selenium in the insect *Corcyra*  
426 *cephalonica*: Uptake of <sup>75</sup>Se and subcellular distribution. *Biol Trace Elem Res* 41:217–233 (1994).
- 427 41. Bartůněk V, Junková J, Šuman J, Kolářová K, Rimpelová S, Ulbrich P, Sofer Z, Preparation of  
428 amorphous antimicrobial selenium nanoparticles stabilized by odor suppressing surfactant  
429 polysorbate 20. *Mater Lett* 152:207–209 (2015).
- 430 42. Vahdati M, Tohidi Moghadam T, Synthesis and characterization of selenium nanoparticles-lysozyme  
431 nanohybrid system with synergistic antibacterial properties. *Sci Rep* 10:510 (2020).
- 432 43. Cedergreen N, Ritz C, Streibig JC, Improved empirical models describing hormesis. *Environ Toxicol*  
433 *Chem* 24:3166–3172 (2005).
- 434 44. Ritz C, Baty F, Streibig JC, Gerhard D, Dose-response analysis using R. *PLoS One* 10:e0146021  
435 (2015).

- 436 45. Golombieski RM, Graichen DÂS, da Rocha JBT, da Silva Valente VL, da Silva Loreto ÉL, Over-  
437 activation of the *Drosophila melanogaster hsp83* gene by selenium intoxication. *Genet Mol Biol*  
438 31:128–135 (2008).
- 439 46. Martin-Romero FJ, Kryukov GV, Lobanov AV, Carlson BA, Lee BJ, Gladyshev VN, et al., Selenium  
440 metabolism in *Drosophila*. *J Biol Chem* 276:29798–29804 (2001).
- 441 47. Golubkina N, Sheshnitsan S, Kapitalchuk M, Ecological importance of insects in selenium biogenic  
442 cycling. *Int J Ecol* 2014:835636 (2014).
- 443 48. Reich HJ, Hondal RJ, Why nature chose selenium. *ACS Chem Biol* 11:821–841 (2016).
- 444 49. Vickerman DB, Trumble JT, George GN, Pickering IJ, Nichol H, Selenium biotransformations in an  
445 insect ecosystem: Effects of insects on phytoremediation. *Environ Sci Technol* 38:3581–3586 (2004).
- 446 50. Bañuelos GS, Vickerman DB, Trumble JT, Shannon MC, Davis CD, Finley JW, et al., Biotransfer  
447 possibilities of selenium from plants used in phytoremediation. *Int J Phytoremediation* 4:315–329  
448 (2002).
- 449 51. Vickerman DB, Trumble JT, Biotransfer of selenium: Effects on an insect predator, *Podisus*  
450 *maculiventris*. *Ecotoxicology* 12:497–504 (2003).
- 451 52. Butler CD, Trumble JT, Predicting population dynamics of the parasitoid *Cotesia marginiventris*  
452 (Hymenoptera: Braconidae) resulting from novel interactions of temperature and selenium.  
453 *Biocontrol Sci Technol* 20:391–406 (2010).
- 454 53. Salem SS, Fouda MMG, Fouda A, Awad MA, Al-Olayan EM, Allam AA, et al., Antibacterial,  
455 cytotoxicity and larvicidal activity of green synthesized selenium nanoparticles using *Penicillium*  
456 *corylophilum*. *J Clust Sci* 32:351–361 (2021).
- 457 54. Wäckers FL, The effect of food supplements on parasitoid–host dynamics. *Proceedings of the First*  
458 *International Symposium on Biological Control of Arthropods*, Honolulu, Hawaii, pp. 226-231  
459 (2003).
- 460 55. Miksanek JR, Heimpel GE, A matrix model describing host–parasitoid population dynamics: The  
461 case of *Aphelinus certus* and soybean aphid. *PLoS One* 14:e0218217 (2019).
- 462 56. Miksanek JR, Heimpel GE, Density-dependent lifespan and estimation of life expectancy for a  
463 parasitoid with implications for population dynamics. *Oecologia* 194:311–320 (2020).
- 464 57. Chapple CE, Guigó R, Relaxation of selective constraints causes independent selenoprotein extinction  
465 in insect genomes. *PLoS One* 3:e2968 (2008).
- 466 58. Lobanov AV, Hatfield DL, Gladyshev V, Selenoproteinless animals: Selenophosphate synthetase  
467 SPS1 functions in a pathway unrelated to selenocysteine biosynthesis. *Protein Sci* 17:176–182  
468 (2008).



- 469 59. Alburaki M, Smith KD, Adamczyk J, Karim S, Interplay between Selenium, selenoprotein genes, and  
470 oxidative stress in the honey bee *Apis mellifera* L. *J Insect Physiol* 117:103891 (2019).
- 471 60. Shchedrina VA, Kabil H, Vorbruggen G, Lee BC, Turanov AA, Hirosawa-Takamori M, et al.,  
472 Analyses of fruit flies that do not express selenoproteins or express the mouse selenoprotein,  
473 methionine sulfoxide reductase B1, reveal a role of selenoproteins in stress resistance. *J Biol Chem*  
474 286: 29449 – 29461 (2011).
- 475 61. Santesmasses D, Mariotti M, Gladyshev VN, Bioinformatics of selenoproteins. *Antioxid Redox Signal*  
476 33:525–536 (2020).

477 **Table 1.** Parameter estimates for the Cedergreen–Ritz–Streibig-modified log-logistic model for the  
478 concentration-dependent effect of selenium nanoparticles (0–1000 mg L<sup>-1</sup>) on the lifespan of the  
479 parasitoid *Anisopteromalus calandrae* in the absence of hosts.

| <b>Parameter</b>              | <b>Grouping (sex)</b> | <b>Estimate</b> | <b>SE</b> | <b>t-value</b> | <b>p-value</b> |
|-------------------------------|-----------------------|-----------------|-----------|----------------|----------------|
| <i>b</i>                      | Female                | 0.47            | 0.09      | 5.29           | < <b>0.001</b> |
|                               | Male                  | 0.84            | 0.16      | 5.24           | < <b>0.001</b> |
| <i>d</i> (upper asymptote)    | Female                | 4.55            | 0.15      | 29.60          | < <b>0.001</b> |
|                               | Male                  | 3.01            | 0.16      | 19.21          | < <b>0.001</b> |
| <i>e</i>                      | –                     | 494.80          | 118.95    | 4.16           | < <b>0.001</b> |
| <i>f</i> (effect of hormesis) | –                     | 1.63            | 0.44      | 3.73           | < <b>0.001</b> |

480

481 **Table 2.** Statistical tests of the effects of selenium nanoparticles (25 mg L<sup>-1</sup>) on the life history  
482 parameters of adult female parasitoids (*Anisopteromalus calandrae*) and offspring.

| <b>Response (Model)</b>              | <b>Predictor</b>     | <b>df</b> | <b><math>\chi^2</math></b> | <b><i>p</i>-value</b> |
|--------------------------------------|----------------------|-----------|----------------------------|-----------------------|
| Age at death (Cox prop. hazards)     | SeNP treatment       | 1         | 4.27                       | <b>0.039</b>          |
| Reproduction (linear regression)     | SeNP treatment       | 1         | 16.24                      | <b>&lt; 0.001</b>     |
| Sex ratio (binomial GLM)             | SeNP treatment       | 1         | 0.89                       | 0.346                 |
| Development time (Cox prop. hazards) | Sex                  | 1         | 18.38                      | <b>&lt; 0.001</b>     |
|                                      | SeNP treatment       | 1         | 0.03                       | 0.856                 |
|                                      | Sex × SeNP treatment | 1         | 0.02                       | 0.884                 |

483

484 **Table 3a.** Correlation between early and late reproduction (number of offspring per day) by female  
485 *Anisopteromalus calandrae* and the effects of selenium nanoparticles (25 mg L<sup>-1</sup>).

| Predictor                                                                  | df | $\chi^2$ | <i>p</i> -value |
|----------------------------------------------------------------------------|----|----------|-----------------|
| Early reproductive rate<br>[log(age-adjusted number of offspring per day)] | 1  | 42.97    | < <b>0.001</b>  |
| SeNP treatment                                                             | 1  | 6.32     | <b>0.016</b>    |
| Early reproductive rate × SeNP treatment                                   | 1  | 0.00     | 0.946           |

486

487 **Table 3b.** Parameter estimates for the Michaelis–Menten-type model of the lifetime reproductive success  
488 of selenium nanoparticle-treated (25 mg L<sup>-1</sup>) female parasitoids (*Anisopteromalus calandrae*).

| Parameter                                      | Estimate | SE    | <i>t</i> -value | <i>p</i> -value |
|------------------------------------------------|----------|-------|-----------------|-----------------|
| Maximum number of parasitized hosts, <i>m</i>  | 44.72    | 17.85 | 2.51            | < <b>0.001</b>  |
| $\beta$                                        | 21.94    | 11.91 | 1.84            | < <b>0.001</b>  |
| Preoviposition period, <i>t</i> <sub>pre</sub> | 1.90     | 0.30  | 6.35            | < <b>0.001</b>  |
| Effect of SeNP treatment, $\gamma$             | 0.02     | 0.01  | 3.62            | < <b>0.001</b>  |

489

490 **Table 4.** Statistical tests of the effects of the parasitoid *Anisopteromalus calandrae* and selenium  
491 nanoparticles (25 mg L<sup>-1</sup>) on the host/pest (azuki bean beetle) population.

| <b>Response (Model)</b>           | <b>Predictor</b>                     | <b>df</b> | <b><math>\chi^2</math></b> | <b><i>p</i>-value</b> |
|-----------------------------------|--------------------------------------|-----------|----------------------------|-----------------------|
| Host emergence<br>(LMM)           | Parasitoid presence                  | 1         | 26.91                      | <b>&lt; 0.001</b>     |
|                                   | SeNP treatment                       | 1         | 0.61                       | 0.436                 |
|                                   | Parasitoid presence × SeNP treatment | 1         | 8.14                       | <b>0.004</b>          |
| Host sex ratio<br>(binomial GLMM) | Parasitoid presence                  | 1         | 0.06                       | 0.808                 |
|                                   | SeNP treatment                       | 1         | 9.22                       | <b>0.002</b>          |
|                                   | Parasitoid presence × SeNP treatment | 1         | 0.13                       | 0.715                 |

492

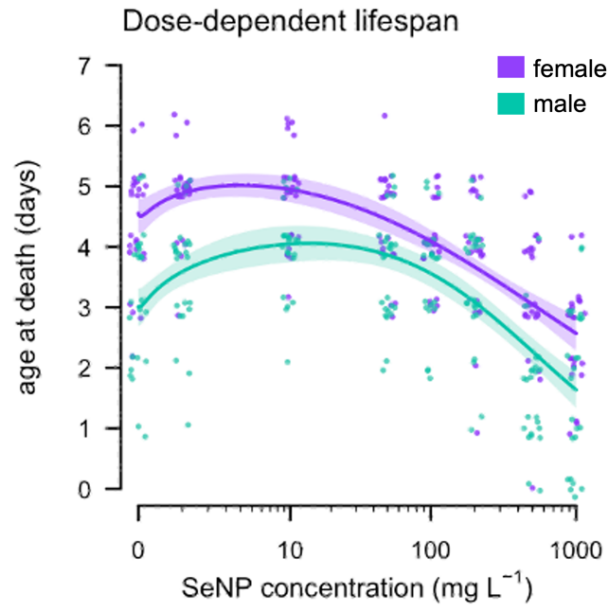

493

494 **Figure 1.** Dose-dependent lifespan of the parasitoid *Anisopteromalus calandrae* (adult lifespan, i.e. age at  
495 death) treated individually with different concentrations of selenium nanoparticles (SeNPs) in the absence  
496 of hosts; the solid line plots the Cedergreen–Ritz–Streibig-modified log-logistic model (with 95% CI);  
497 points plot observed values (jittered for clarity).

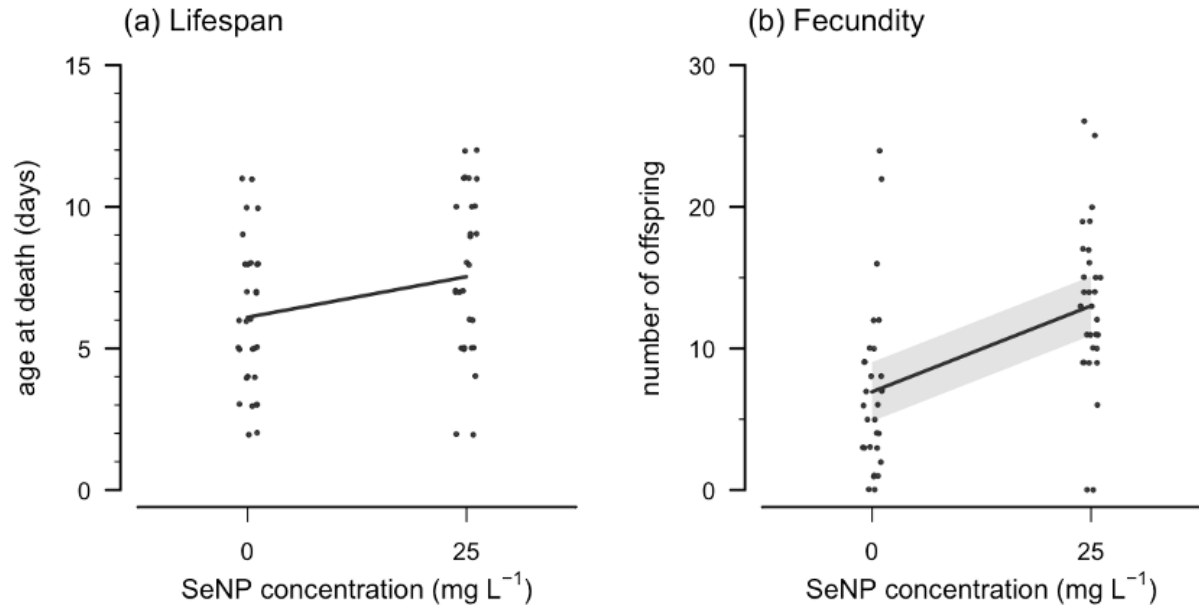

498

499 **Figure 2.** Lifespan and fecundity of adult female *Anisopteromalus calandrae* as a function of selenium  
500 nanoparticle (SeNP) treatment (0 or 25 mg L<sup>-1</sup>). **(a)** Lifespan of adult female parasitoids; the solid line  
501 indicates the average age at death. **(b)** Fecundity (total number of offspring); the solid line plots the linear  
502 regression model (with 95% CI). In both panels, points plot observed values (jittered for clarity).

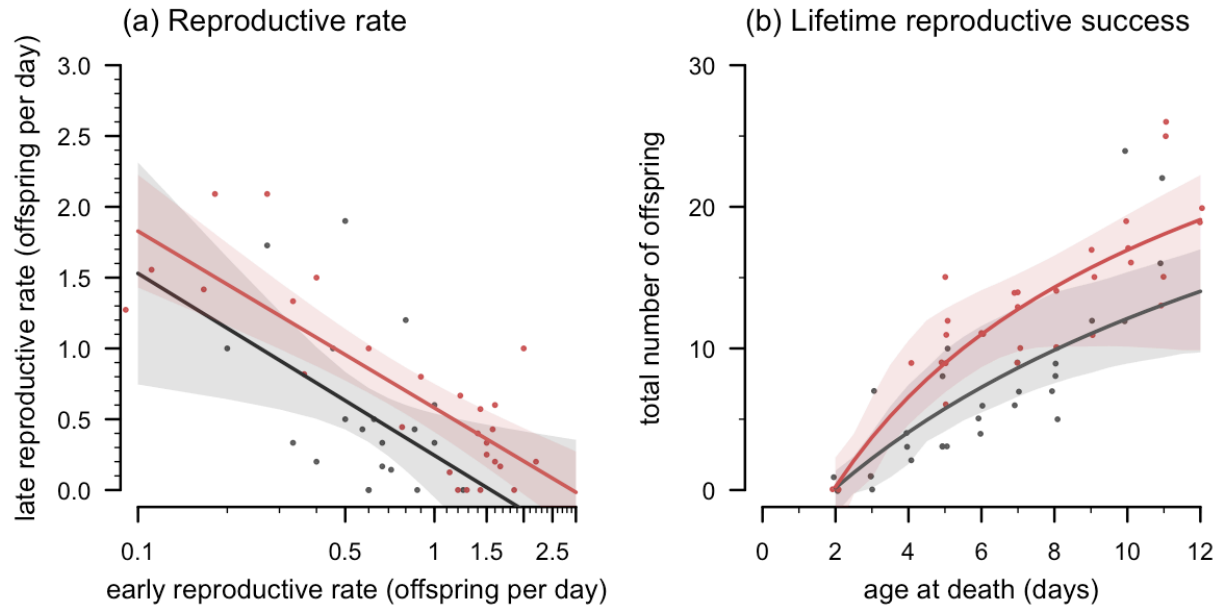

503  
504 **Figure 3.** Reproduction of the generalist parasitoid *Anisopteromalus calandrae* as a function of age and  
505 selenium nanoparticle (SeNP) treatment (0 or 25 mg L<sup>-1</sup>). **(a)** Correlation between the early and late  
506 reproductive rates of female parasitoids (number of offspring per day [age-adjusted], days 0–3 vs. day 4–  
507 death); the solid line plots the linear regression model (with 95% CI). **(b)** Lifetime reproduction, or the  
508 total number of offspring [per female]; solid lines plot the Michaelis-Menten-type models (with 95% CI).  
509 In both panels, points plot observed values (jittered for clarity in panel b).



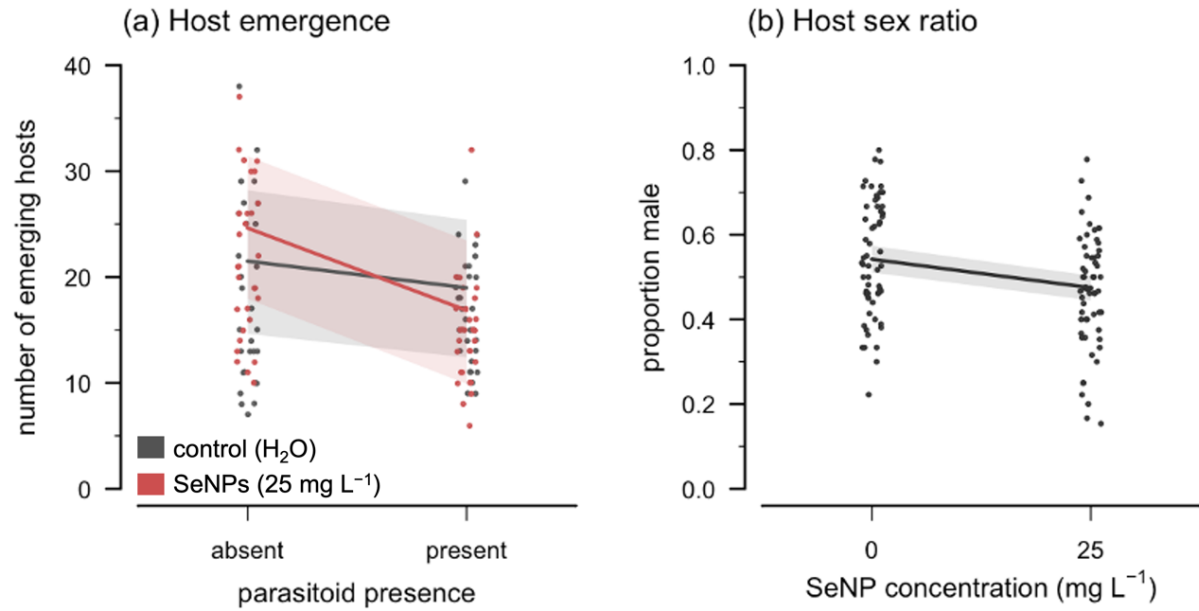

510

511 **Figure 4.** Influence of parasitism and selenium nanoparticle (SeNP) treatment (0 or 25 mg L<sup>-1</sup>) on the  
512 host/pest population. **(a)** Host suppression, or the number of emerging adult azuki bean beetles; solid lines  
513 plot the population-level predictions from the LMM (with 95% prediction interval). **(b)** Sex ratio of  
514 emerging beetles; the solid line plots the population-level predictions from the binomial GLMM (with  
515 95% prediction interval). In both panels, points plot observed values (jittered for clarity).
